# Supplementary material for: PTPRK regulates glycolysis and de novo lipogenesis to promote hepatocyte metabolic reprogramming in obesity
Source: PubMed Central journal article supplement — Nat Commun. 2024 Nov 4;15:9522. doi: 10.1038/s41467-024-53733-0 (PMC11535053; doi:10.1038/s41467-024-53733-0), 2024-11-04
Supplement: 41467_2024_53733_MOESM1_ESM.pdf [file 41467_2024_53733_MOESM1_ESM.pdf]

## **Supplementary information**

### **PTPRK regulates glycolysis and *de novo* lipogenesis to promote hepatocyte metabolic reprogramming in obesity**

Eduardo H. Gilglioni, Ao Li, Wadsen St-Pierre-Wijckmans, Tzu-Keng Shen, Israel Pérez-Chávez, Garnik Hovhannisyán, Michela Lisjak, Javier Negueruela, Valerie Vandenbempt, Julia Bauzá-Martinez, Jose M. Herranz, Daria Ezeriņa, Stéphane Demine, Zheng Feng, Thibaut Vignane, Lukas Otero Sanchez, Flavia Lambertucci, Alena Prašnická, Jacques Devière, David C. Hay, Jose A. Encinar, Sumeet Pal Singh, Joris Messens, Milos R. Filipovic, Hayley J. Sharpe, Eric Trépo, Wei Wu and Esteban N. Gurzov

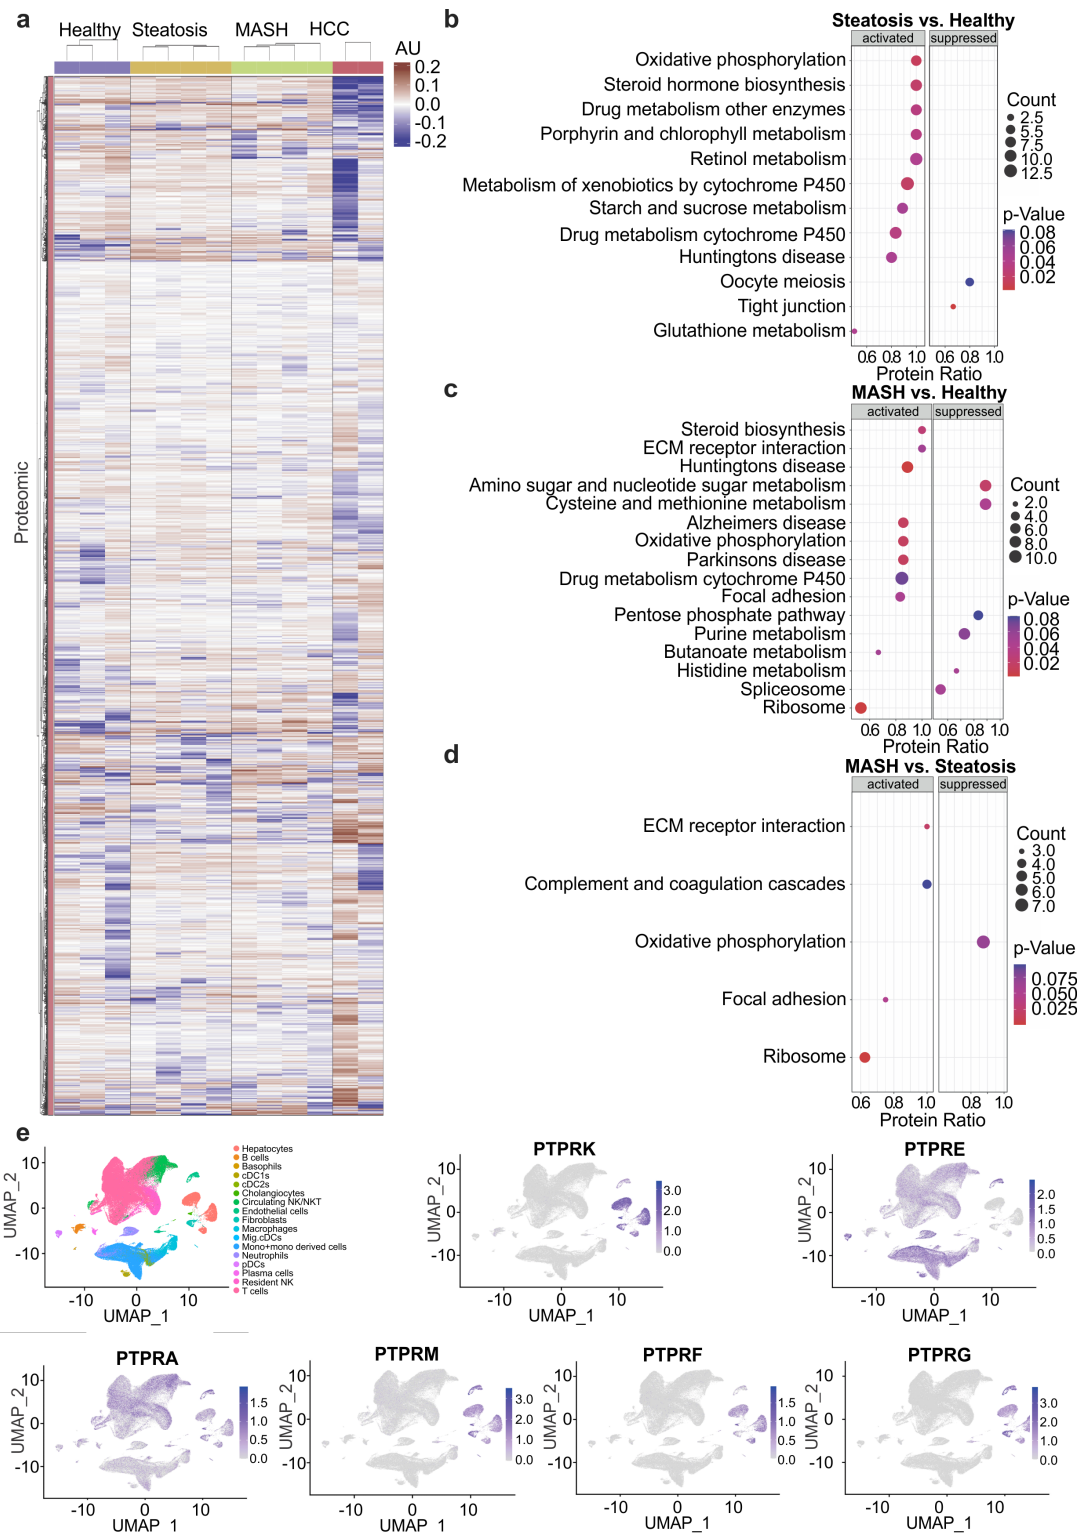

**Supplementary Figure 1: Comprehensive liver proteomics, pathway enrichment, and receptor PTPs expression in different hepatic cells.** (a) Heatmap displaying the hepatic proteome profile. (b) Proteomic KEGG pathway enrichment analysis comparing steatosis and healthy livers. (c) Proteomic KEGG pathway enrichment analysis comparing MASH and healthy livers. (d) Proteomic KEGG pathway enrichment analysis comparing livers with MASH and steatosis. (e) Data extracted from GSE192740 showing UMAPs with distinct cell clusters identified in the liver and the distribution of various receptor PTPs across parenchymal and non-parenchymal hepatic cells. In a-d, differential expression was performed using EdgeR package after TMM normalization of read counts. p-value was adjusted using Benjamini-Hochberg method. Source data are provided as a Source Data file.

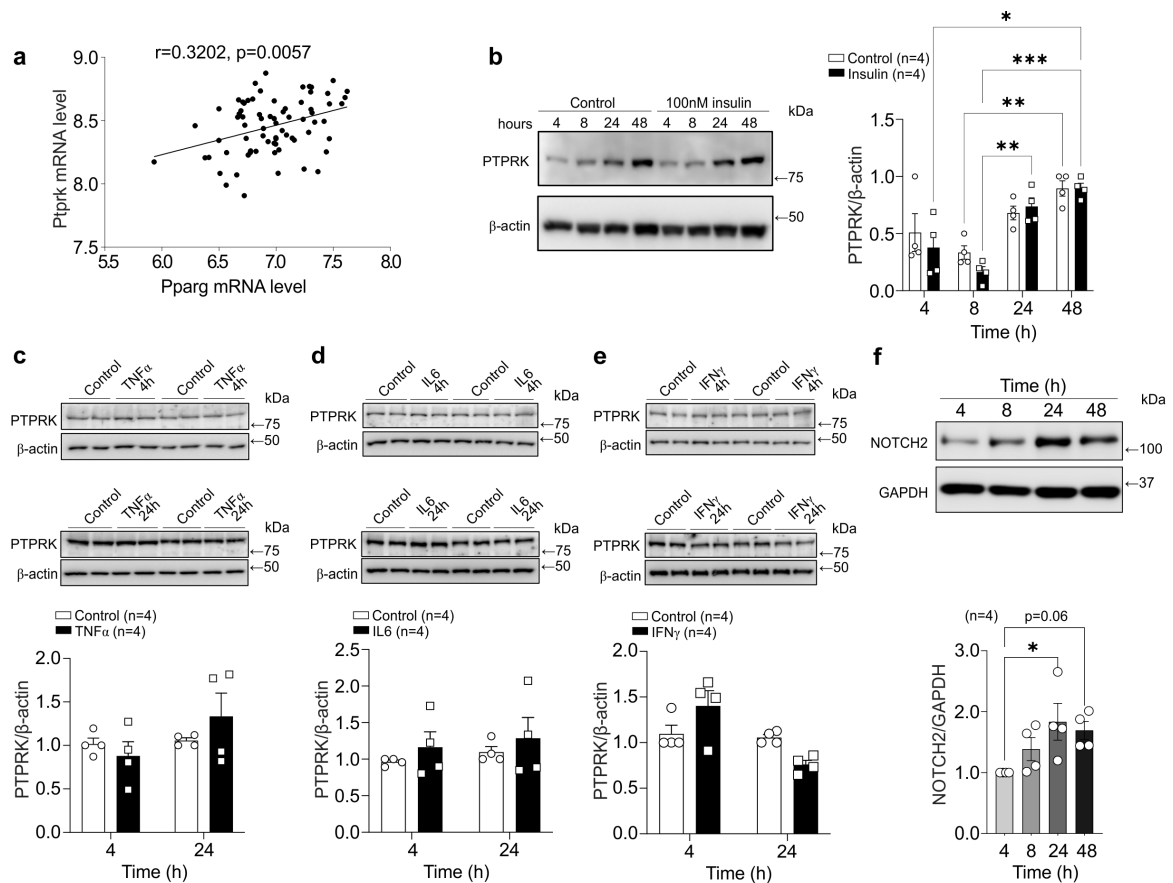

**Supplementary Figure 2: Insulin or cytokine treatment does not affect PTPRK expression and culture of primary hepatocytes enhances Notch2 expression.** (a) Correlation analysis between Ptpk and Pparg mRNA levels in the E-GEOD-48452 dataset. (b) Immunoblot analysis of PTPRK expression in mouse primary hepatocytes cultured over time with insulin supplementation. (c) Immunoblot analyses of PTPRK expression in mouse primary hepatocytes with acute (4h) and chronic (24h) TNF $\alpha$  treatment. (d) Immunoblot analyses of PTPRK expression in mouse primary hepatocytes with acute (4h) and chronic (24h) IL6 treatment. (e) Immunoblot analyses of PTPRK expression in mouse primary hepatocytes with acute (4h) and chronic (24h) IFN $\gamma$  treatment. (f) Immunoblot analyses of NOTCH2 expression in mouse primary hepatocytes over time in culture. The presented data represents the average of multiple independent experiments. In **b-f** results are shown as means  $\pm$  SEM. Statistical analyses were done using two-way ANOVA (**b-e**) or two-tailed unpaired Student's t test (**f**). Correlation analyses were performed by using the Spearman rank-correlation test (**a**). Statistical significance is indicated as \* $p < 0.05$ , \*\* $p < 0.01$ , \*\*\* $p < 0.001$ . Source data are provided as a Source Data file.

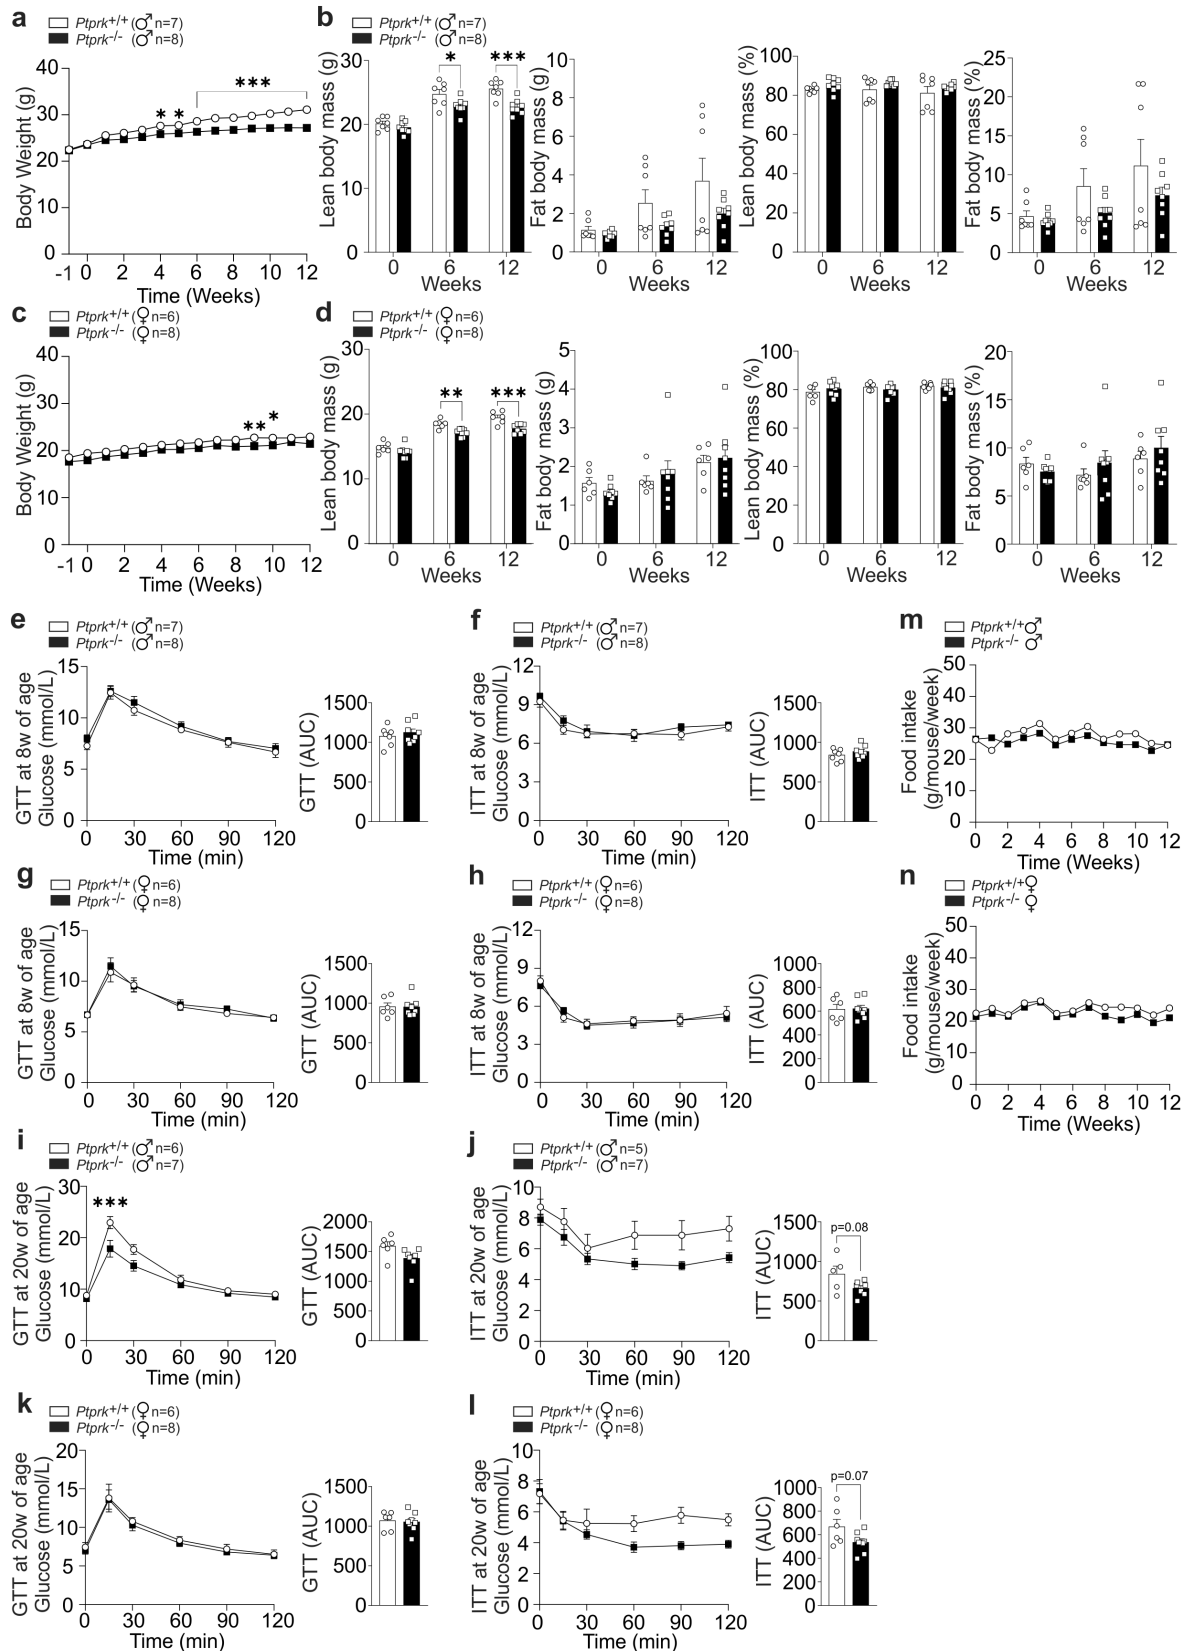

**Supplementary Figure 3: Metabolic phenotype shows minor differences in body weight and composition in  $Ptpkr^{-/-}$  and  $Ptpkr^{+/+}$  mice fed a chow diet.**

(a) Male (♂)  $Ptpkr^{-/-}$  and  $Ptpkr^{+/+}$  C57BL6N mice aged eight weeks were fed a chow diet for 12 weeks, and body weight was measured weekly. (b) Body composition in male mice. (c) Female (♀)  $Ptpkr^{+/+}$  and  $Ptpkr^{-/-}$  C57BL6N mice aged eight weeks were continuously fed a chow diet for 12 weeks, and body weight was measured weekly. (d) Body composition of

female mice. **(e)** Glucose tolerance tests in male mice at 8 weeks of age. **(f)** Insulin tolerance tests in male mice at 8 weeks of age. **(g)** Glucose tolerance tests in female mice at 8 weeks of age. **(h)** Insulin tolerance tests in female mice at 8 weeks of age. **(i)** Glucose tolerance tests in male mice at 20 weeks of age. **(j)** Insulin tolerance tests in male mice at 20 weeks of age. **(k)** Glucose tolerance tests in female mice at 20 weeks of age. **(l)** Insulin tolerance tests in female mice at 20 weeks of age. **(m)** Food intake in male mice. **(n)** Food intake in female mice. In **a-l** results are shown as means  $\pm$  SEM. Statistical analyses were done using two-tailed unpaired Student's t-test (**e-l**) or using two-way ANOVA (**a-d**). Statistical significance is indicated as \* $p < 0.05$ , \*\* $p < 0.01$ , \*\*\* $p < 0.001$ , or exact p-value. Source data are provided as a Source Data file.

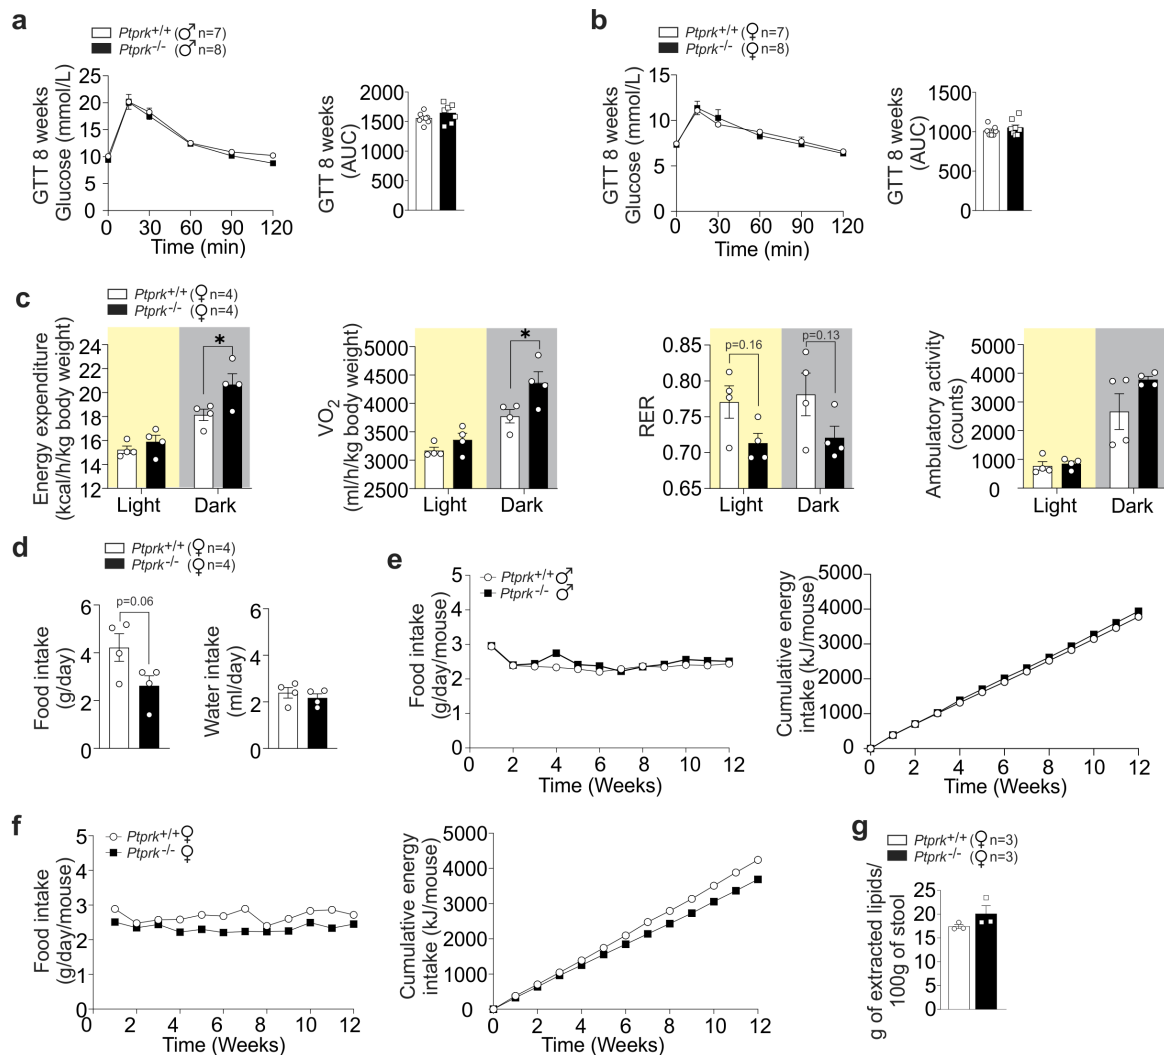

**Supplementary Figure 4: Metabolic assessments in  $Ptpdk^{-/-}$  and  $Ptpdk^{+/+}$  mice fed a high-fat, high-fructose, high-cholesterol diet.** (a, b) Glucose tolerance test performed in male (a) and female (b) mice at 8 weeks of age (before the HFHFHCD feeding). (c) Energy expenditure, oxygen consumption ( $VO_2$ ), respiratory exchange ratio ( $RER=VCO_2/VO_2$ ) and ambulatory activity measurements in female  $Ptpdk^{+/+}$  and  $Ptpdk^{-/-}$  mice after HFHFHCD feeding for 10 weeks. (d) Daily food and water intake in female  $Ptpdk^{+/+}$  and  $Ptpdk^{-/-}$  mice (e) Average food intake and cumulative energy intake analyses in male mice fed HFHFHCD. (f) Average food intake and cumulative energy intake analyses in females fed HFHFHCD. (g) Lipid extraction from stool samples collected over three consecutive days before the end of the 12-week HFHFHCD feeding experimental period in female mice. In a-d, g results are shown as means  $\pm$  SEM. Statistical analyses were done using two-tailed unpaired Student's t-test (a-d, g). Statistical significance is indicated as \* $p < 0.05$ , or exact p-value. Source data are provided as a Source Data file.

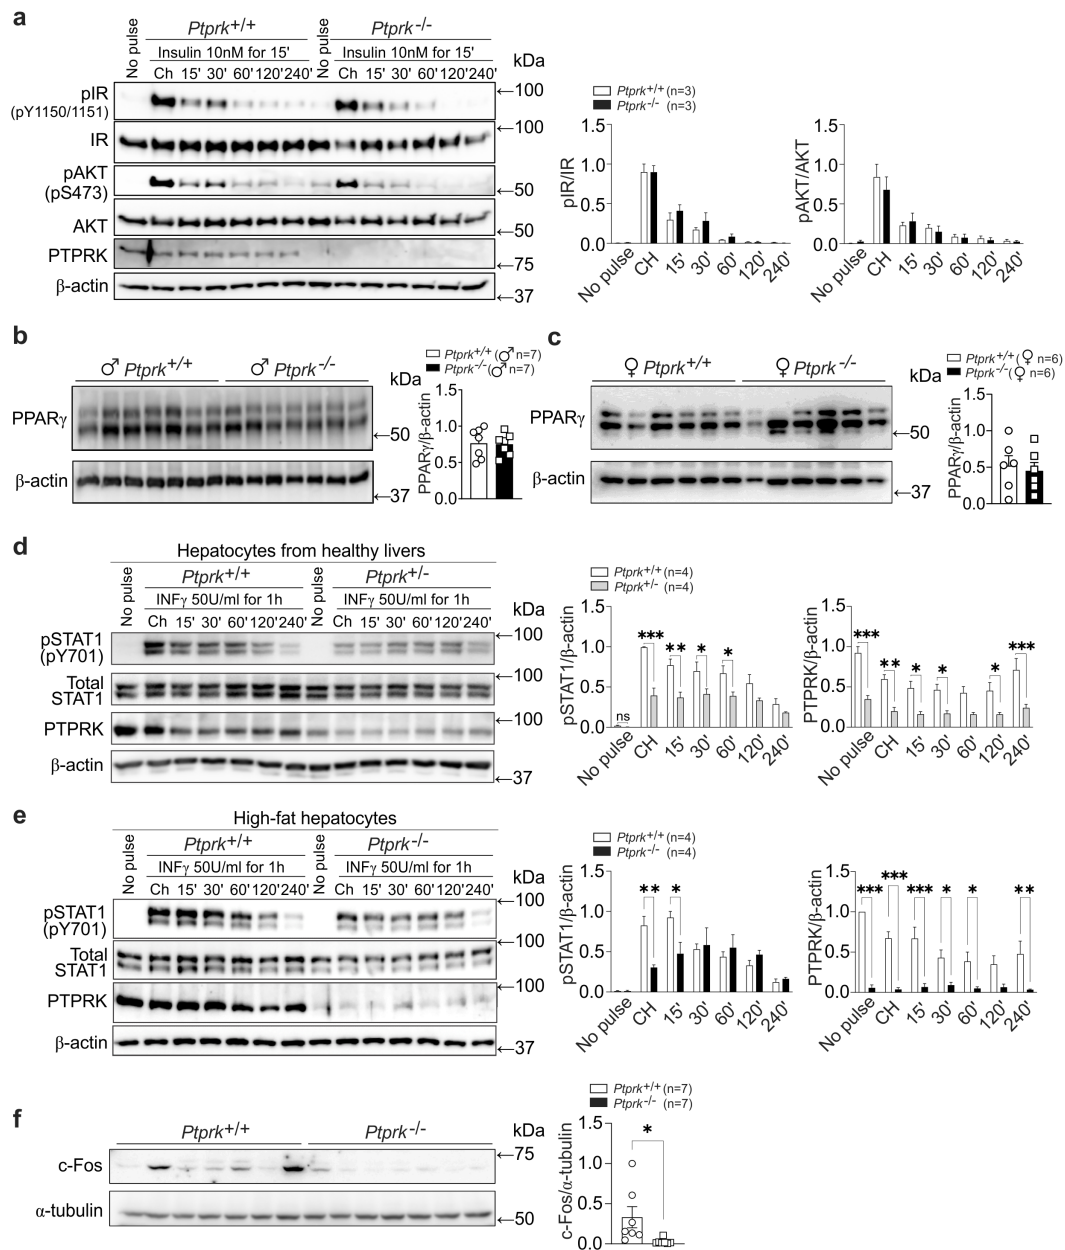

**Supplementary Figure 5: Effect of PTPRK on insulin signalling, IFN $\gamma$ -induced STAT1 activation and hepatic c-Fos expression.** (a) Immunoblot analysis of pIR, IR, pAKT, AKT, and PTPRK in hepatocytes isolated from *Ptprk*<sup>-/-</sup> and *Ptprk*<sup>+/+</sup> mice cultured overnight and subjected to insulin pulse (10 nM for 15 min) and chase (Ch) experiments. (b, c) Visceral epididymal (males, b) and uterine (females, c) white adipose tissues were collected from *Ptprk*<sup>-/-</sup> and *Ptprk*<sup>+/+</sup> mice after 12 weeks of HFHFHCD feeding and proteins were extracted for immunoblot analysis of PPAR $\gamma$ . (d) Immunoblot analysis showing lower PTPRK levels associated with decreased pSTAT1 activation in response to IFN $\gamma$  in *Ptprk*<sup>-/-</sup> and *Ptprk*<sup>+/+</sup> hepatocytes after a 1h exposure to 50 U/ml IFN $\gamma$ . (e) Immunoblot analysis demonstrates the suppression of IFN $\gamma$ -induced STAT1 activation in *Ptprk*<sup>-/-</sup> and *Ptprk*<sup>+/+</sup> hepatocytes with high-fat content isolated from steatotic livers of male mice at 14 weeks of age following a 1-hour exposure to 50 U/ml IFN $\gamma$ . (f) c-Fos expression was assessed by immunoblot analysis in livers from female *Ptprk*<sup>-/-</sup> and *Ptprk*<sup>+/+</sup> mice fed a HFHFHCD for 12 weeks. The presented data represent the average of multiple independent experiments. In a-f results are shown as means  $\pm$  SEM. Statistical analyses were done using two-way ANOVA (a, d, e) or two-tailed unpaired Student's t-test (b, c, f). Statistical significance is indicated as \* $p < 0.05$ , \*\* $p < 0.01$ , \*\*\* $p < 0.001$ . Source data are provided as a Source Data file.

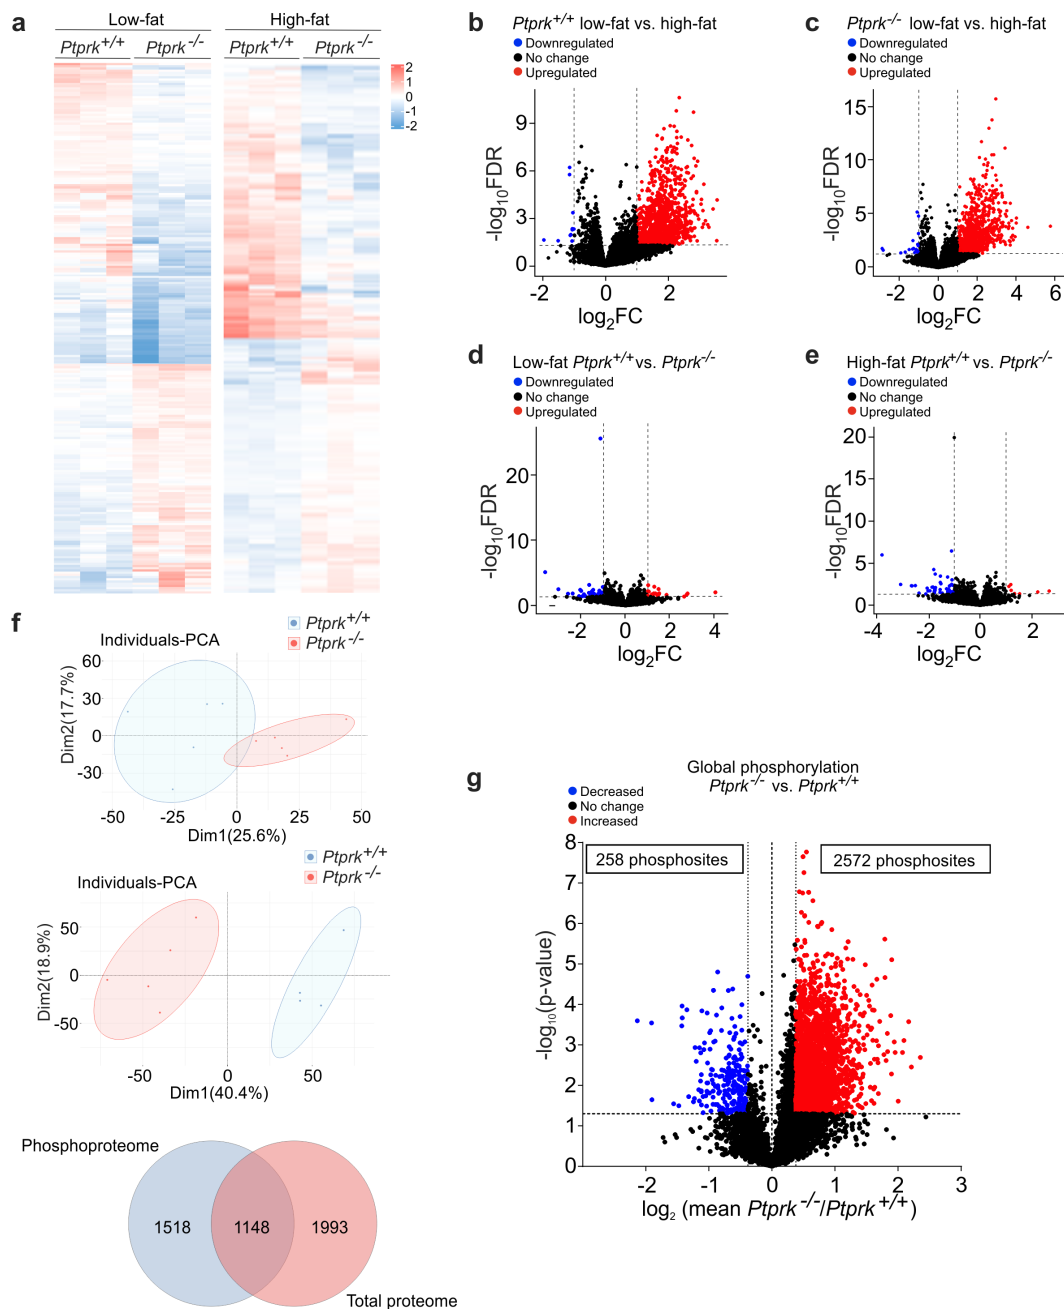

**Supplementary Figure 6: Transcriptome, proteome, and protein phosphorylation assays in primary mouse hepatocytes isolated from *Ptpdk*<sup>-/-</sup> and *Ptpdk*<sup>+/+</sup> mice.** (a) RNA-Seq heatmap showing alterations in mRNA expression in hepatocytes with low- and high-fat content. (b) Volcano plot demonstrating the quantification of transcripts in high-fat and low-fat *Ptpdk*<sup>+/+</sup> hepatocytes. (c) Volcano plot demonstrating the quantification of transcripts in high-fat and low-fat *Ptpdk*<sup>-/-</sup> hepatocytes. (d) Volcano plot displaying the quantification of transcripts between *Ptpdk*<sup>+/+</sup> and *Ptpdk*<sup>-/-</sup> hepatocytes with low fat content. (e) Volcano plot displaying the quantification of transcripts between *Ptpdk*<sup>+/+</sup> and *Ptpdk*<sup>-/-</sup> hepatocytes with high-fat content. (f) PCA analysis depicting changes in the total proteome (top part) and phosphoproteome (middle part) in *Ptpdk*<sup>+/+</sup> and *Ptpdk*<sup>-/-</sup> hepatocytes. Principal component analysis (PCA) examination revealed that the PCA scores for PC1 (Dim1) and PC2 (Dim2) generated a biplot that segregated into two distinct groups. PC1 and PC2 collectively explained 43.3% of the variability between *Ptpdk*<sup>-/-</sup> and *Ptpdk*<sup>+/+</sup> samples, with PC1 accounting for 25.6% and PC2 for 17.7% of the variance, respectively. A similar analysis for the



phosphoproteomics data showed a more pronounced difference, with PCA scores for PC1 (Dim1) and PC2 (Dim2) producing a biplot that distinctly separated two groups. In this case, PC1 and PC2 together explained 59.3% of the variability between *Ptprk*<sup>-/-</sup> and *Ptprk*<sup>+/+</sup> samples, with PC1 contributing 40.4% and PC2 contributing 18.9% of the variance. One group comprised *Ptprk*<sup>+/+</sup> hepatocytes, while the other group consisted of *Ptprk*<sup>-/-</sup> hepatocytes, both showing strong alignment along PC2. Venn diagram illustrating proteins identified in the phosphoproteome and total proteome (bottom part). (g) Volcano plot showing the quantification of phosphosites between *Ptprk*<sup>-/-</sup> and *Ptprk*<sup>+/+</sup> hepatocytes with high-fat content. In **b-e**, raw data was processed by DESeq2 and statistical analysis performed by the binomial Wald test, two-sided p-values adjusted with Benjamini-Hochberg method. In **g**, Welch's two-sided t-test was used, and p-value was adjusted using the Permutation based FDR method with 250 randomizations. Source data are provided as a Source Data file.

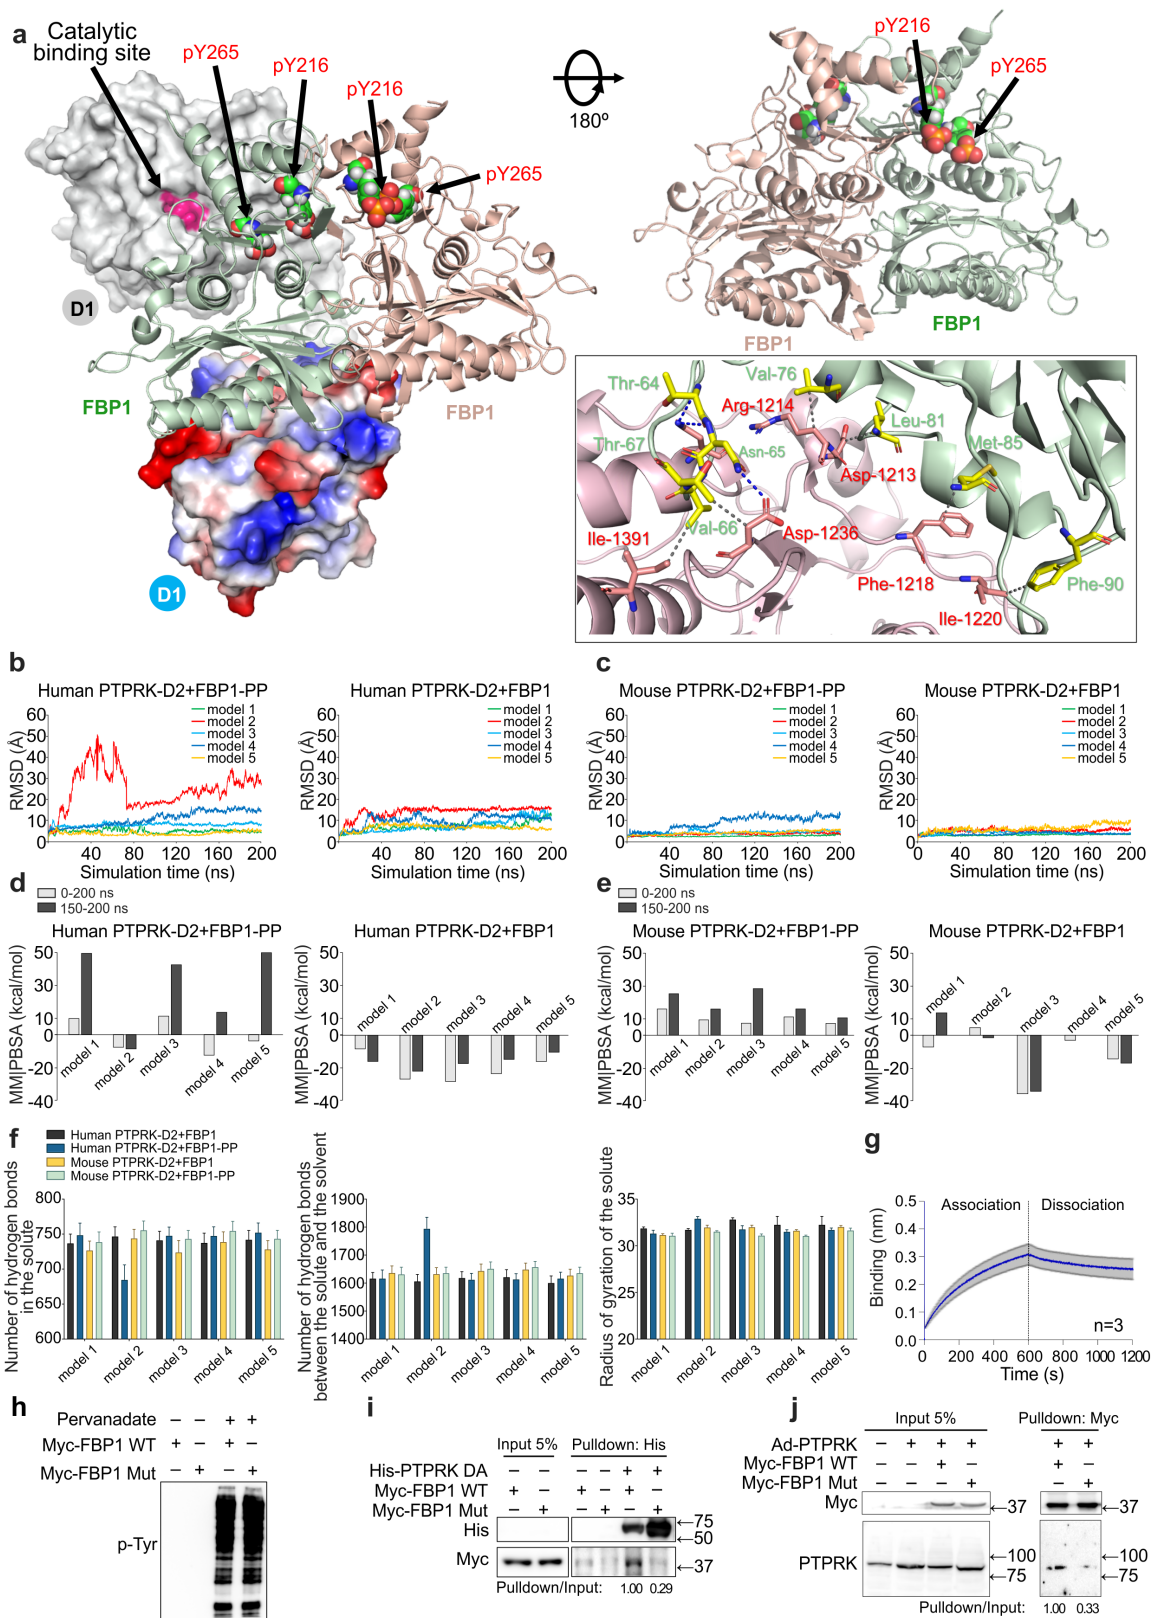

**Supplementary Figure 7: Computational and Experimental Analysis of the PTPRK-FBP1 Interaction.** (a) Structural prediction of the PTPRK-D2:FBP1 phosphorylated dimer complex after 200 ns of molecular dynamics simulation. The electrostatic potential coloured surface of PTPRK-D2, and the polypeptide backbone of the FBP1-pY216, pY265 dimer are shown (light green and light pink). In addition, an open model of PTPRK-D1-D2 (D1 shows the molecular surface in grey) has been superimposed to highlight the proximity of the catalytic site of PTPRK-D1 and the pY216, pY265 residues (represented as spheres) and front

view from the catalytic site of PTPRK-D1 representing the surface of each FBP1 monomer (light green and light pink), where the solvent accessible position of the phosphate groups of residues pY216, pY265 (spheres) is highlighted. At the right bottom part of panel **a**, PTPRK-D2:FBP1 interface (backbone) is shown and the amino acids (sticks) that stabilize the interaction of the complex are highlighted. **(b-c)** The RMSD values in Å for the five interaction models calculated during the 200 ns MD simulation for human PTPRK **(b)** and mouse PTPRK **(c)**. **(d, e)** Solvation binding energy (MM|PBSA, Kcal/mol) values are presented for the simulation time intervals of 0-200 and 150-200 ns, for the PTPRK-D2:FBP1 dimer complex, for both phosphorylated (PP-FBP1, pY265 and pY245) and non-phosphorylated FBP1, in human **(d)** and mouse **(e)** protein. **(f)** Number of H-bonds between the amino acids of the PTPRK-D2:FBP1 dimer complex, number of H-bonds between all amino acids of the PTPRK-D2:FBP1 dimer complex with the solvent and radius of gyration of the solute calculated as the mean  $\pm$  SD during the 200 ns of MD simulation. **(g)** Human His-FBP1 and a His-tagged nonspecific protein of 22 kDa (negative control) were immobilized onto Octet-NTA biosensors. A wavelength shift (nm) was recorded after incubation with PTPRK at a concentration of 200 nM for 10 min. Subsequently, the protein-bound biosensor was incubated in buffer to measure the dissociation reaction, with background subtraction performed to remove nonspecific binding of PTPRK to the immobilized FBP1. The result is the mean  $\pm$  SEM of 3 independent experiments. **(h)** HepG2 cells were transfected with either human FBP1-myc wild-type or a triple tyrosine mutant (Y216F, Y245F, and Y265F). Western blot showing increased tyrosine phosphorylation in pervanadate-treated samples. **(i)** Recombinant PTPRK pulldown assay. HepG2 cells were transfected with either human wild-type (WT) or a triple tyrosine mutant (Mut, Y265F, Y245F, Y216F). Pervanadate-treated HepG2 lysates were incubated with purified recombinant His.TEV.Avi.PTPRK ICD D1057A conjugated to pre-washed Ni-Sepharose His-tagged protein resin at room temperature for 1h on a rotor, followed by immunoblotting with indicated antibodies. The result is representative of 2 independent experiments. **(j)** HepG2 cells were transduced with an adenoviral vector to induce PTPRK overexpression (Ad-PTPRK) and then transfected with either human FBP1-myc wild-type (WT) or a triple tyrosine mutant (Mut, Y265F, Y245F, Y216F). Pervanadate-treated cells were lysed and immunoprecipitated with anti-Myc magnetic beads, followed by immunoblotting with indicated antibodies. The result is representative of 2 independent experiments. Source data are provided as a Source Data file.

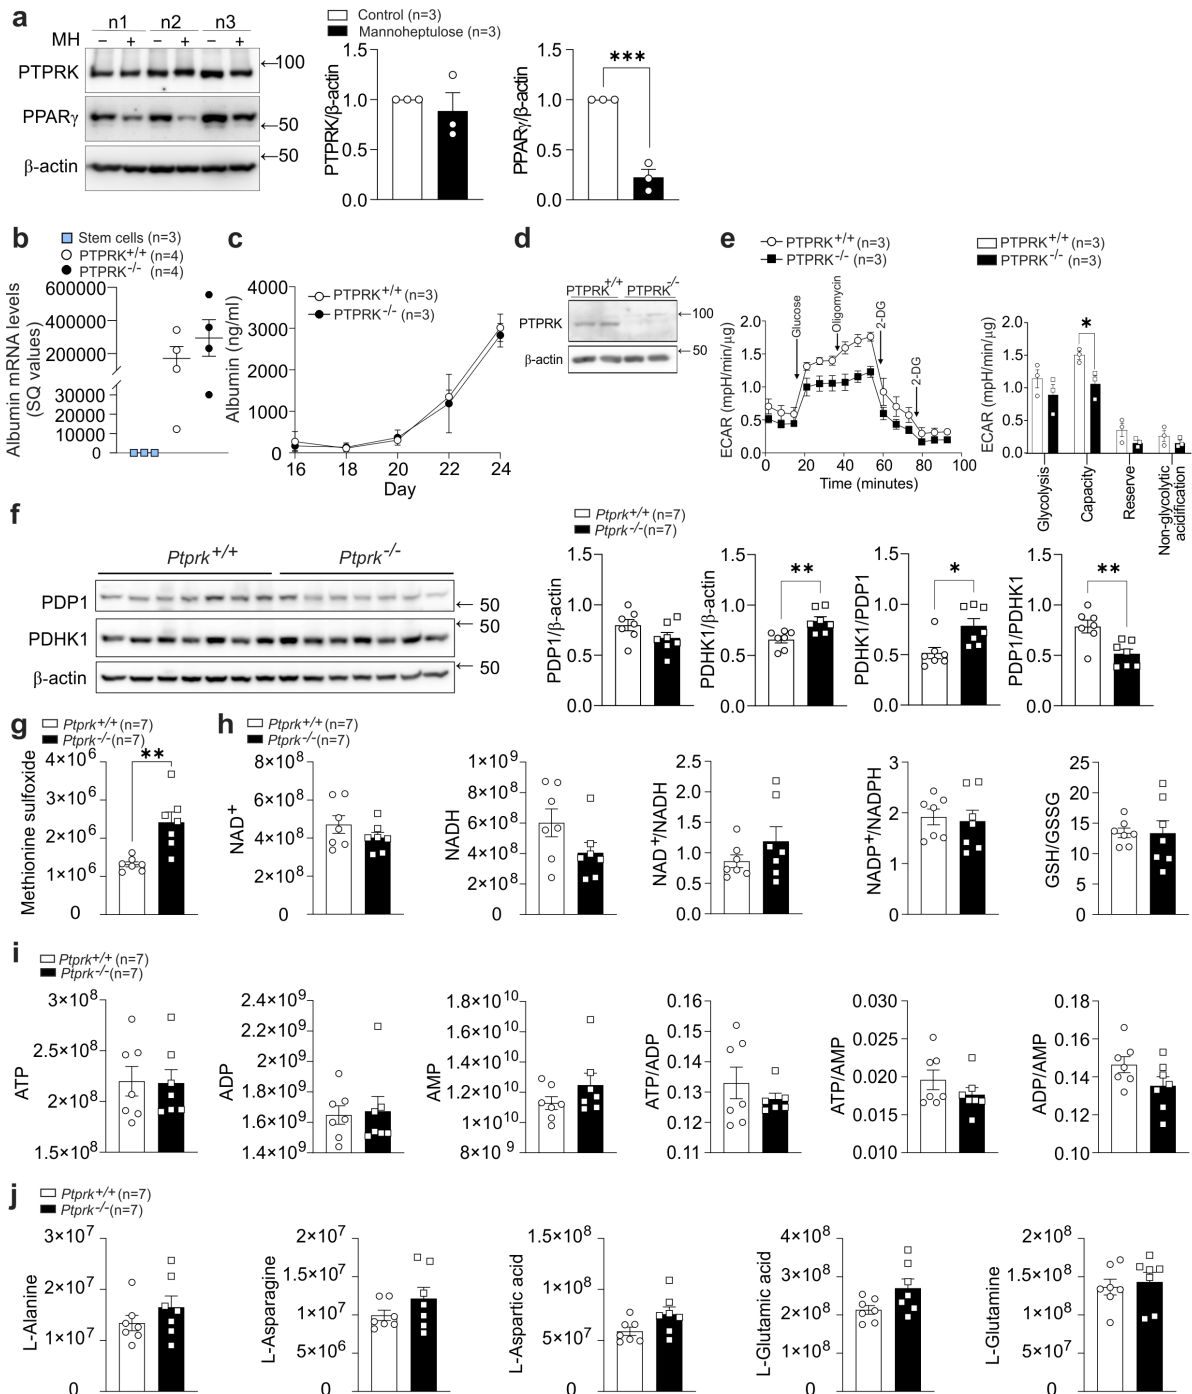

**Supplementary Figure 8: Metabolic profiling of *PTPRK*<sup>-/-</sup> and *PTPRK*<sup>+/+</sup> human stem cell-derived hepatocyte-like cells and metabolite analysis in livers from *Ptpmk*<sup>-/-</sup> and *Ptpmk*<sup>+/+</sup> mice.** (a) Primary mouse hepatocytes after overnight in culture were exposed to 24h mannoheptulose (MH) as indicated and PTPRK and PPAR $\gamma$  were assessed by immunoblot. (b) Human embryonic stem cells underwent CRISPR-Cas12a editing to delete PTPRK and were differentiated into hepatocyte-like cells. Albumin mRNA levels were measured in stem cells, *Ptpmk*<sup>+/+</sup>, and *Ptpmk*<sup>-/-</sup> hepatocyte-like cells. (c) Albumin levels were quantified over the course of the differentiation process using ELISA. (d) Immunoblot analysis of PTPRK was performed after differentiation into hepatocyte-like cells. (e) Glycolysis stress test performed in *PTPRK*<sup>-/-</sup> and *PTPRK*<sup>+/+</sup> hepatocyte-like cells. Real-time measurements of the extracellular acidification rate (ECAR) in response to glycolytic modulators were recorded. The ECAR results were normalized by protein content. (f) Liver samples from *Ptpmk*<sup>-/-</sup> and *Ptpmk*<sup>+/+</sup> female mice fed a 12-week HFHFHCD were extracted and processed for immunoblot analysis to evaluate the expression of PDP1 and PDHK1. (g-i) Livers were harvested from *Ptpmk*<sup>-/-</sup> and

*Ptprk*<sup>+/+</sup> female mice fed a 12-week HFHFHCD and metabolite analysis was conducted using mass spectrometry: (g) methionine sulfoxide, (h) redox status indicators NAD<sup>+</sup>, NADH, NADP<sup>+</sup>/NADPH and reduced glutathione (GSH) to oxidized glutathione (GSSG) ratios (i) energy status indicators ATP, ADP, AMP, and their ratios and (j) levels of amino acids. Metabolites are presented as raw abundances corrected for liver sample weight. The presented data represent the average of multiple independent experiments. In **a-c**, **e-j** results are shown as means ± SEM. Statistical analyses in **a-c**, **e-j** were done using two-tailed unpaired Student's t-test. Statistical significance is indicated as \*p < 0.05, \*\*p < 0.01, \*\*\*p < 0.001. Source data are provided as a Source Data file.

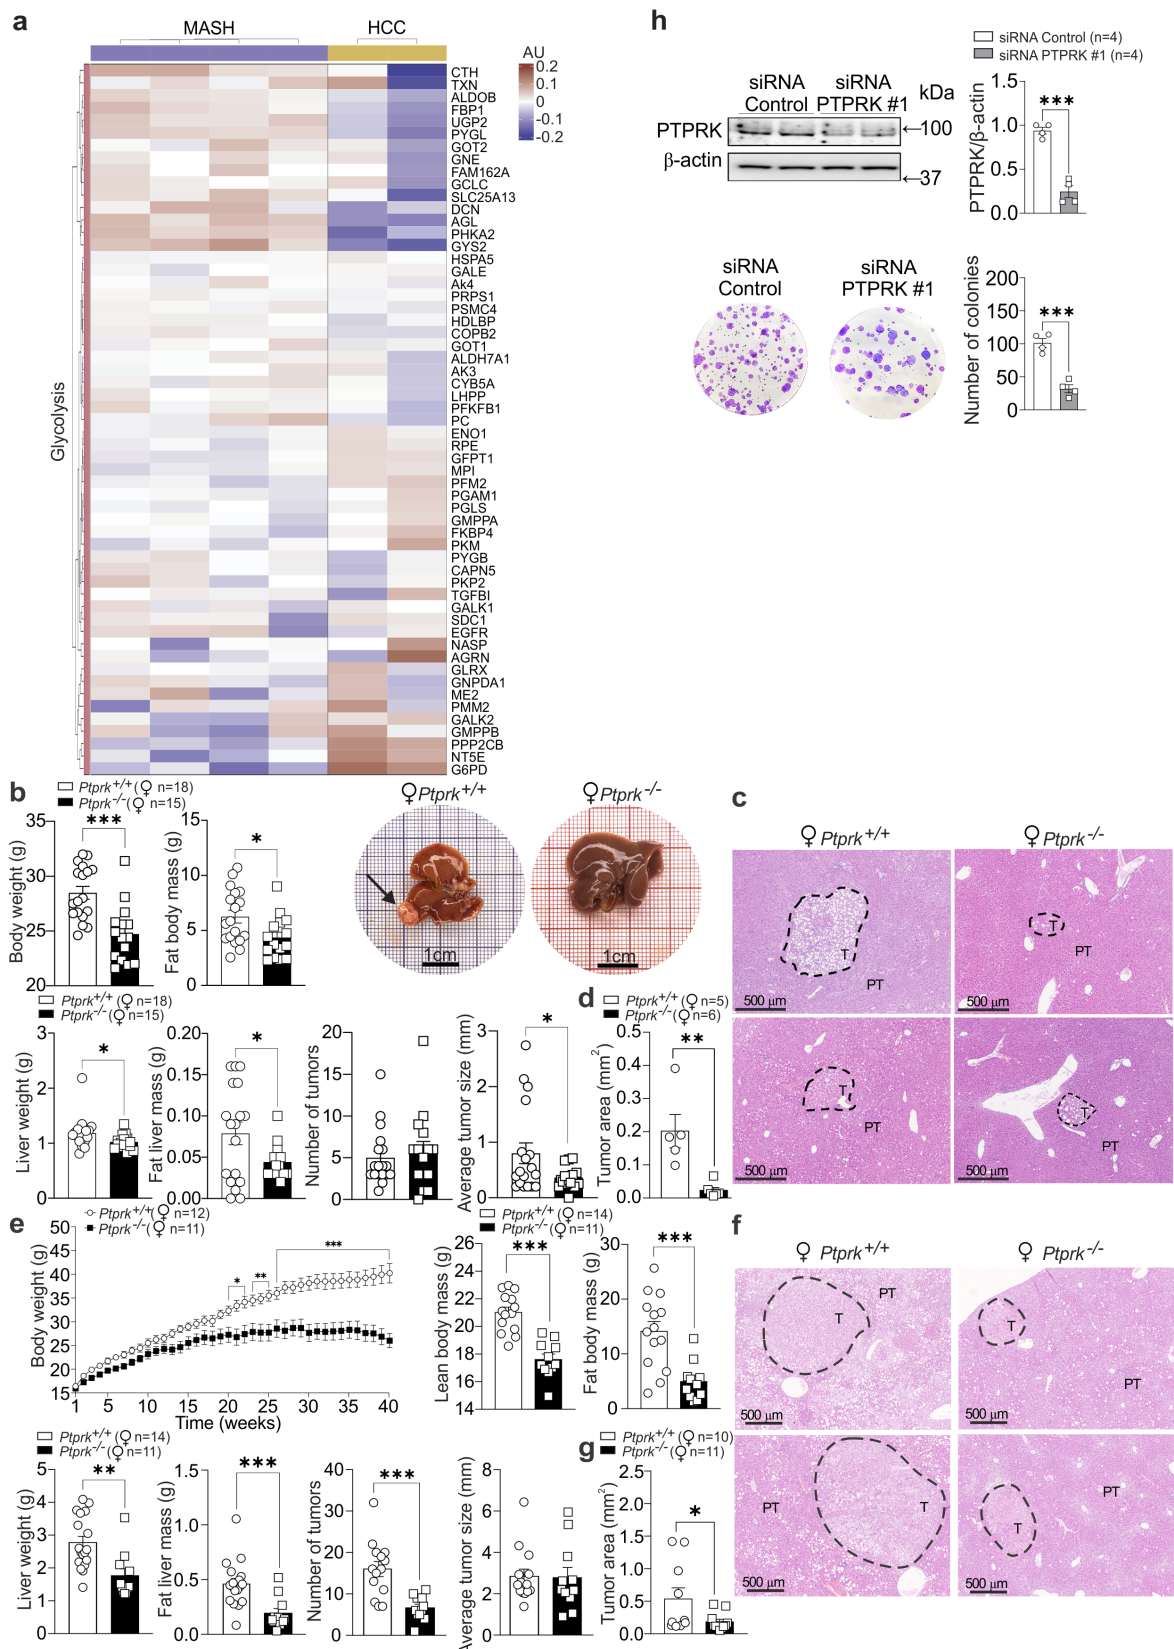

**Supplementary Figure 9: Expression of glycolysis-related proteins in MASH and HCC human liver samples, tumour development in female mice, and PTPRK knockdown effects in hepatoma cells. (a)** Heatmaps were generated to illustrate the expression of proteins involved in glycolysis/gluconeogenesis in human liver samples from individuals with NASH or HCC. **(b-g)** Female *Ptpdk*<sup>-/-</sup> and *Ptpdk*<sup>+/+</sup> mice were subjected to diethylnitrosamine (DEN) induction of liver cancer at 2 weeks of age. **(b-d)** Mice were fed a chow diet and tumour

development was assessed when the animals reached 40 weeks of age. **(e-g)** Female *Ptprk*<sup>-/-</sup> and *Ptprk*<sup>+/+</sup> mice were fed a HFHFHCD at 6 weeks of age, and tumour harvesting was performed after 40 weeks of feeding, at 46 weeks of age. Measurements of body weight, fat body mass, liver weight, and fat liver mass were recorded. Tumours on the surface of the hepatic lobes were counted and measured, considering tumours larger than 0.2mm. The results are presented as the number of tumours per liver and average tumour size **(b, e)**. Tumour area measurements were performed using hematoxylin-eosin-stained paraffin-embedded liver sections of the left lobe for the identification and measurement of the area of microtumours within the hepatic lobe. Representative hematoxylin-eosin-stained sections show the presence of nodules, scale bar = 500  $\mu\text{m}$  **(c, f)** and tumour area **(d, g)**. **(h)** Huh6 cells were transfected with siRNA targeting PTPRK or siRNA control. Transfection efficiency was confirmed by immunoblot analysis, and colony-forming capacity was assessed using crystal violet staining for colony number counting (n=4). In **b, d, e, g, h** results are shown as means  $\pm$  SEM. Statistical analyses were done using two-tailed unpaired Student's t-test **(b, d, e, g, h)**. Statistical significance is indicated as \*p < 0.05, \*\*p < 0.01, \*\*\*p < 0.001. Source data are provided as a Source Data file.

| ID    | Biopsy health status | Age | Weight (kg) | Height (cm) | BMI (kg/m <sup>2</sup> ) | Type 2 diabetes | Gender | Steatosis score | Fibrosis | Experiment |
|-------|----------------------|-----|-------------|-------------|--------------------------|-----------------|--------|-----------------|----------|------------|
| CHR01 | Healthy liver        | 80  | 46          | 175         | 15                       | No              | M      | 0               | F0       | MS/IHC     |
| CHR02 | Healthy liver        | 66  | 62          | 150         | 28                       | No              | F      | 0               | F0       | MS/IHC     |
| CHR03 | Healthy liver        | 28  | 66          | 170         | 23                       | No              | F      | 0               | F0       | IHC        |
| CHR04 | Healthy liver        | 63  | 66          | 165         | 24                       | No              | F      | 0               | F0       | MS/IHC     |
| CHR08 | Steatosis            | 53  | 86          | 185         | 25                       | Yes             | F      | 2               | F0       | MS/IHC     |
| CHR09 | Steatosis            | 39  | 80          | 158         | 32                       | No              | F      | 1               | F0       | MS/IHC     |
| CHR10 | Steatosis            | 56  | 67          | 173         | 22                       | No              | M      | 1               | F0       | MS/IHC     |
| CHR11 | Steatosis            | 36  | 82          | 160         | 32                       | No              | F      | 1               | F0       | MS/IHC     |
| CHR12 | Steatosis            | 61  | 76          | 159         | 30                       | No              | F      | 2               | F0       | IHC        |
| CHR13 | Steatosis            | 68  | 115         | 168         | 41                       | Yes             | M      | 1               | F0       | IHC        |
| CHR14 | MASH/cirrhosis       | 61  | 113         | 179         | 35                       | Yes             | M      | 1               | F4       | MS/IHC     |
| CHR16 | MASH/cirrhosis       | 46  | 79          | 156         | 32                       | No              | F      | 2               | F4       | MS/IHC     |
| CHR17 | MASH/cirrhosis       | 48  | 76          | 160         | 30                       | No              | M      | 2               | F4       | MS/IHC     |
| CHR18 | MASH/cirrhosis       | 60  | 80          | 149         | 36                       | Yes             | F      | 1               | F4       | MS/IHC     |
| CHR19 | MASH                 | 46  | 80          | 157         | 32                       | Yes             | F      | 3               | F1       | MS         |
| CHR20 | MASH                 | 45  | 85          | 156         | 35                       | Yes             | F      | 2               | F1       | MS         |
| CHR05 | HCC                  | 83  | 79          | 175         | 26                       | No              | M      | 1               | F4       | MS         |
| CHR06 | HCC                  | 76  | 76          | 165         | 28                       | No              | M      | 1               | F0       | MS         |
| CHR07 | HCC                  | 43  | 43          | 170         | 19                       | No              | M      | 0               | F4       | MS         |

**Supplementary table 1:** Clinical and demographic characteristics of patients from whom liver biopsies were collected and used for mass spectrometry (MS) or PTPRK immunohistochemistry (IHC) analysis shown in Figure 1. The steatosis score is based on NAS score criteria. The fibrosis and steatosis score were based on the criteria defined Kleiner DE, et al. (doi.org/10.1002/hep.20701).

| siRNA               | Source or reference         | Identifiers | Sense (5'→3')             | Antisense (5'→3')          |
|---------------------|-----------------------------|-------------|---------------------------|----------------------------|
| siRNA PTPRK #1      | Ambion by Life Technologies | s11559      | CCAGUAGCCCAG<br>ACUAAGAtt | UCUUAGUCUGGG<br>CUACUGGta  |
| siRNA PTPRK #2      | Ambion by Life Technologies | s11558      | CAGCUAUAGCAG<br>UAUAAGAtt | UCUUUAUCUGCUA<br>UAGCUGat  |
| siRNA PPAR $\gamma$ | Quiagen                     | SI01385391  | GCCAUUCCUUUG<br>ACAUCAAtt | UUGAUGUCAAAAG<br>GAAUGCGag |
| siRNA Control       | Quiagen                     | 1027281     | -                         | -                          |

**Supplementary table 2:** List of siRNAs used for RNA interference in the present study.



| Antibody     | Designation                                                                                      | Source or reference                                    | Identifiers      | Additional information         |
|--------------|--------------------------------------------------------------------------------------------------|--------------------------------------------------------|------------------|--------------------------------|
| β-actin      | Mouse monoclonal anti-beta-actin                                                                 | Sigma-Aldrich                                          | Cat# A1978       | Western blot 1:5000            |
| GAPDH        | Rabbit polyclonal anti-glyceraldehyde-3-phosphate dehydrogenase                                  | R&D Systems                                            | Cat# 2275-PC-100 | Western blot 1:5000            |
| α-tubulin    | Mouse monoclonal anti-alpha-tubulin                                                              | Sigma-Aldrich                                          | Cat# T5168       | Western blot 1:5000            |
| Vinculin     | Rabbit polyclonal anti-vinculin                                                                  | Cell Signaling Technology                              | Cat# 4650        | Western blot 1:1000            |
| pY           | Mouse monoclonal anti-phospho-tyrosine antibody                                                  | Cell Signaling Technology                              | Cat# 9411        | IP 1:50<br>Western blot 1:1000 |
| PTPRK        | Human monoclonal anti-PTPRK                                                                      | Fearnley et al. 2019, Kindly provided by Hayley Sharpe | 2 .H4            | Western blot 1:1000            |
| PTPRK        | Rabbit polyclonal anti-PTPRK                                                                     | Thermo Fisher Scientific                               | Cat# PA5-104089  | IHC 1:100                      |
| PPARγ        | Rabbit monoclonal anti- PPARγ                                                                    | Cell Signaling Technology                              | Cat# 2443        | Western blot 1:500             |
| pIR          | Rabbit monoclonal anti-phospho-IGF-I Receptor β (Tyr1135/1136)/Insulin Receptor β (Tyr1150/1151) | Cell Signaling Technology                              | Cat# 3024S       | Western blot 1:500             |
| IR           | Rabbit monoclonal anti-Insulin Receptor β                                                        | Cell Signaling Technology                              | Cat# 3025        | Western blot 1:1000            |
| pAKT         | Rabbit monoclonal anti-phospho-AKT (Ser473)                                                      | Cell Signaling Technology                              | Cat# 4060        | Western blot 1:1000            |
| AKT          | Mouse monoclonal anti-AKT (pan)                                                                  | Cell Signaling Technology                              | Cat# 2920S       | Western blot 1:1000            |
| ACC          | Mouse monoclonal anti-acetyl CoA carboxylase                                                     | Cell Signaling Technology                              | Cat# 3676S       | Western blot 1:1000            |
| FASN         | Rabbit monoclonal anti-fatty acid synthase                                                       | Cell Signaling Technology                              | Cat# 3180S       | Western blot 1:1000            |
| SREBP1       | Mouse monoclonal anti-sterol regulatory element binding protein 1                                | Santa Cruz Biotechnology                               | Cat# sc-13551    | Western blot 1:1000            |
| ChREBP1α     | Rabbit polyclonal anti-Carbohydrate-responsive element-binding protein alpha                     | Cell Signaling Technology                              | Cat# 58069       | Western blot 1:1000            |
| pFBP1 (Y265) | Rabbit polyclonal anti-Phospho-fructose 1,6 bisphosphatase 1 (Tyr265)                            | Thermo Fisher Scientific                               | Cat# PA5-105335  | Western blot 1:1000            |
| FBP1         | Rabbit polyclonal anti-fructose 1,6 bisphosphatase 1                                             | Cell Signaling Technology                              | Cat# 59172       | Western blot 1:1000            |
| PDP1         | Rabbit monoclonal anti-pyruvate dehydrogenase phosphatase 1                                      | Cell Signaling Technology                              | Cat# 65575S      | Western blot 1:1000            |
| PDHK1        | Rabbit monoclonal anti-pyruvate dehydrogenase kinase 1                                           | Cell Signaling Technology                              | Cat# 3820S       | Western blot 1:1000            |
| c-Fos        | Rabbit polyclonal anti-protein c-Fos                                                             | Cell Signaling Technology                              | Cat# 4384S       | Western blot 1:1000            |
| Notch2       | Rabbit monoclonal anti-Neurogenic locus notch homolog protein 2                                  | Cell Signaling Technology                              | Cat# 5732S       | Western blot 1:1000            |
| pSTAT1       | Mouse monoclonal anti-phospho-STAT1 (Y701)                                                       | BD-Biosciences                                         | Cat# 612132      | Western blot 1:1000            |
| STAT1        | Rabbit polyclonal anti-STAT1                                                                     | Cell Signalling Technology                             | Cat# 9172S       | Western blot 1:1000            |
| His          | Mouse monoclonal anti Histidine Tag                                                              | Bio-Rad                                                | Cat# MCA1396     | Western blot 1:1000            |
| Myc          | Mouse monoclonal anti-Myc-Tag                                                                    | Cell Signaling Technology                              | Cat# 2276        | Western blot 1:1000            |
| HIF-2α       | Rabbit monoclonal anti-Hypoxia-inducible factor 2 alpha                                          | Cell Signaling Technology                              | Cat# 57921S      | Western blot 1:500             |

**Supplementary table 3:** Antibodies used in the present study.

| Gene name                 | qPCR Fw                          | qPCR Rv                     | STD Fw                            | STD Rv                           |
|---------------------------|----------------------------------|-----------------------------|-----------------------------------|----------------------------------|
| Tnf                       | AGGCACTCCCC<br>CAAAAGATG         | TGAGGGTCTGGG<br>CCATAGAA    | ATGAGCACAGA<br>AAGCATGATC         | TACAGGCTTGT<br>CACTCGAATT        |
| Ppary1                    | CCAAGAATACCA<br>AAGTGCGATCA      | AAAACCCTTGCA<br>TCCTTCACAA  | GCTCCAAGAAT<br>ACCAAAGTGCG<br>A   | AACCTGATGGC<br>ATTGTGAGACA       |
| Ppary2                    | TGCCTATGAGCA<br>CTTCACAAG        | TCTACTTTGATC<br>GCACTTTGGTA | AGCATGGTGCC<br>TTCGCTGAT          | GCCCAAACCTG<br>ATGGCATTGTG       |
| Cyp7a1                    | TAAGGAGAAGG<br>AAAGTAGGTGAA<br>C | CCAAATGCCTTC<br>GCAGAAAGTAG | TGGAATAAGGA<br>GAAGGAAAAGTA<br>GG | TCCAAATGCCTT<br>CGCAGAAAGTA      |
| Gapdh                     | AGTTCAACGGCA<br>CAGTCAAG         | TACTCAGCACCA<br>GCATCACC    | ATGACTCTACC<br>CACGGCAAG          | TGTGAGGGAGA<br>TGCTCAGTG         |
| Fasn                      | CACAGTGCTCAA<br>AGGACATGCC       | CACCAGGTGTAG<br>TGCCTTCCTC  | ACTTCCTCTGG<br>GATGTGCCT          | GTCAGCACTGC<br>TCTCGTTGA         |
| Pck1                      | GCAGTGAGGAA<br>GTTTCGTGGA        | GTGAGAGCCAGC<br>CAACAGT     | GCTGCATAACG<br>GTCTGGACT          | ATACATGGTGC<br>GGCCTTTTCAT       |
| Cd36                      | TAATGGCACAGA<br>CGCAGC           | GGTTGTCTGGAT<br>TCTGGAGGG   | TAATGGCACAG<br>ACGCAGC            | ACATCACCCT<br>CCAATCCCA          |
| Cpt1 $\alpha$             | GCTGATGACGG<br>CTATGGTGT         | AAAGCGGTGTGA<br>GTCTGTCT    | CCACAACAACG<br>GCAGAGCA           | TCAGGAGCAAC<br>ACCTATTCATTT<br>G |
| Scd1                      | TGCCGTGGGCG<br>AGGG              | ACACCCCGATAG<br>CAATATCCA   | TGATGTTCCAG<br>AGGAGGTACTA<br>CA  | AATGCATCATTA<br>ACACCCCGA        |
| Ptprk                     | TCGTGATTGGCT<br>TCGGG            | CCAGCATTGACC<br>TCCACA      | TGAAGGAGAAT<br>GACACCCAC          | TCTGAAAGAGG<br>CAGCAAATCT        |
| Acly                      | TTCGTCAAACAG<br>CACTTCC          | ATTTGGCTTCTT<br>GGAGGTG     | ACACCATCATCT<br>GTGCTCGG          | ATCCCAGGGGT<br>GACGATACA         |
| Acaca<br>(Acc)            | AGCCAGAAGGG<br>ACAGTAGAA         | CTCAGCCAAGCG<br>GATGTAAG    | GCGCTTACATT<br>GTGGATGGC          | AAGCCTTCACT<br>GTGCCTTCA         |
| Actb<br>( $\beta$ -actin) | ACGGCCAGGTCAT<br>CACTATT         | GTTGGCATAGAGGT<br>CTTTACG   | AGAGGAAATCGTG<br>CGTGAC           | TCTCCTTCTGCAT<br>CCTGTCA         |
| Alb<br>(human)            | GAAAAGTGGGC<br>AGCAAATGT         | GGTTCAGGACCA<br>CGGATAGA    | GAGCAGCTTGG<br>AGAGTACAA          | GTTTCAGCATTA<br>AACTCTTT         |

**Supplementary table 4:** Primer sequences used for RT-PCR experiments.
